# Supplementary material for: Prenatal androgen induced lean PCOS impairs mitochondria and mRNA profiles in oocytes
Source: PubMed Central journal article supplement (PMC7159265; doi:10.1530/ec-19-0553), 2020-01-25
Supplement: supplementary_material.pdf [file supplementary_material.pdf]

## Supplementary Materials

### *Glucose Tolerance Test:*

Mice (12 weeks old) in diestrus were fasted for six hours in wire bottom cages. After 6 hours, baseline blood samples for blood glucose were collected from the saphenous vein using the Accucheck Nano Glucometer with Accucheck Smart View Test Strips (Roche, Switzerland). Following baseline measurements, a dose of 1 gram/kilogram glucose (Sigma-Aldrich, MO, USA) was given intra-peritoneally. This was marked as time zero. Further blood samples were obtained at 15, 30, 60, 120 and 180 minutes. Insulin levels were measured with serum collected at each time point in the GTT using a mouse insulin ELISA kit (Merckodia, Sweden) per manufacturer's instructions.

### *Superovulation and Oocyte Retrieval:*

Superovulation was performed using pregnant mare serum gonadotropin (PMSG, Fisher Scientific, Hampton, NH) and human chorionic gonadotropin (hCG, EMD Millipore, Germany). These were both diluted in sterile water and injected intraperitoneally. First, 10 IU of PMSG were injected, followed by 10 IU of hCG approximately 47-52 hours after the PMSG. Mice were euthanized by cervical dislocation under isoflurane anesthesia approximately 18 hours following the hCG injection.

Upon euthanization, the abdominal cavity was opened, and the uterine horns were identified. These were dissected in a cephalad fashion to isolate the distal portion of the uterine horn, the ovary, and the bursa. This section of the reproductive tract was removed and placed in approximately 1000  $\mu$ l KSOM EmbryoMax media (Sigma, MO, USA) that had been pre-incubated at 37°C with 5% CO<sub>2</sub> and 6% O<sub>2</sub> conditions. The material was then removed and placed on a pre-incubated petri dish in 200  $\mu$ l of KSOM. The ampulla was isolated under a microscope and was removed from the remainder of the tissue using sharp dissection and placed in a separate 100  $\mu$ l droplet of KSOM. Here, gentle traction was applied to the ampulla until a micro-perforation was created, allowing the cumulus oophorous complex (COC) containing the superovulated oocytes

to be released. These were gathered with a 135  $\mu\text{m}$  stripper tip (Origio, Charlottesville, VA) and moved to a clean 100  $\mu\text{l}$  droplet of KSOM. After collection of COCs from both ampullas, they were placed in 0.3 mg/mL hyaluronidase (Sigma, MO, USA) diluted in KSOM for under 30 seconds to denude to cumulus cells and isolate the oocytes. The oocytes were washed 3-5 times in KSOM. All immature oocytes were removed from analysis, and metaphase II (MII) oocytes were isolated and allocated for further study.

## Mitochondrial Imaging Studies

### Inner Mitochondrial Membrane (IMM) Potential

Oocytes were isolated from each mouse as described above. For IMM, 1 mL of JC-1 dye was mixed daily from stock solution stored at  $-30^{\circ}\text{C}$  by diluting 2  $\mu\text{l}$  of stock into 998  $\mu\text{l}$  of PBS, resulting in 2  $\mu\text{M}$  concentration of JC-1. Oocytes were incubated in 250  $\mu\text{l}$  of dye for 30 minutes at  $37^{\circ}\text{C}$ , then rinsed in serial PBS washes. The oocytes were then placed on pre-labeled positively charged microscope slides (vWR, Sugarland, TX) in approximately 1  $\mu\text{l}$  of PBS and covered with Prolonged Gold Antifade mounting agent (ThermoFisher, Waltham, MA) and cover slip. Oocytes were immediately visualized using fluorescent microscopy with 20x and 60x objectives using appropriate filters. By comparing the red to green fluorescence ratio, the strength of the IMM was quantified using Image J software.

### Reactive Oxygen Species (ROS)

For ROS measurement, 1 mL of CellRox Green dye was mixed daily from stock solution stored at  $-30^{\circ}\text{C}$  by diluting 2  $\mu\text{l}$  of stock into 998  $\mu\text{l}$  of PBS. This would result in 5  $\mu\text{M}$  concentration. Oocytes were incubated in 250  $\mu\text{l}$  of dye for 30 minutes at  $37^{\circ}\text{C}$ , then rinsed in serial PBS washes. The oocytes were then placed on pre-labeled positively charged microscope slides (vWR, Sugarland, TX) in approximately 1  $\mu\text{l}$  of PBS and covered with Prolonged Gold Antifade mounting agent (ThermoFisher, Waltham, MA) and cover slip. Oocytes were then immediately visualized using fluorescent microscopy with 20x and 60x objectives and quantified using Image J software.

## Lipid Peroxidation

For lipid peroxidation measurement, 1 mL of BODIPY dye was also mixed daily from stock solution stored at  $-30^{\circ}\text{C}$  by diluting 1  $\mu\text{l}$  of stock into 999  $\mu\text{l}$  of PBS. After isolation, oocytes were incubated in 4% paraformaldehyde solution (Sigma, MO, USA) for 45 minutes at  $37^{\circ}\text{C}$ . Following this step, oocytes were then placed in 250  $\mu\text{l}$  of BODIPY dye for 1 hour at room temperature, then washed serially in PBS. Oocytes were then placed in approximately 1  $\mu\text{l}$  of PBS on a pre-labeled microscope slide and covered with Prolonged Gold Antifade mounting agent (ThermoFisher, Waltham, MA). The oocytes were immediately visualized with a fluorescent microscope with 20x and 60x objectives. Measurement of fluorescence was performed using Image J software.

## *ATP Concentration:*

For measurement of ATP concentration, 5-15 oocytes from a single mouse were pooled and placed in 45  $\mu\text{l}$  lysis buffer (Promega, Madison, WI, USA), vortexed for 1 minute, then centrifuged at 12,000g for 10 minutes at  $4^{\circ}\text{C}$ . The supernatant was removed and stored in a 200  $\mu\text{l}$  Eppendorf tube at  $-80^{\circ}\text{C}$ . Upon collection of all ATP samples, samples were analyzed using an ATP kit utilizing a luciferase assay (ThermoFisher, Waltham, MA) per kit instructions. Standards used for this ELISA ranged from 0, 1, 2.5, 5, 10, 25, 50, and 100  $\mu\text{M}$ , all samples were run in duplicate.

## *Gene Analysis:*

For the collection of DNA and cDNA, three to five oocytes were collected from each mouse and underwent whole genome amplification. For DNA, the Repli-G Single Cell Kit (Qiagen, Germany) was used. The DNA libraries were stored at  $-80^{\circ}\text{C}$  until further use. For the creation of cDNA libraries, the WTA Single Cell Kit (Qiagen, USA) was utilized. The cDNA library was stored at  $-80^{\circ}\text{C}$  until subsequent use.

## Mitochondrial DNA Copy Number

Mitochondrial DNA copy number was assessed using the DNA library created as described above. Real time quantitative PCR (rt-PCR) was performed with 1:500 diluted samples. Reaction mix was prepared fresh daily, and 8  $\mu$ l was added to each well. Following this, 2  $\mu$ l of diluted DNA was added. Incubation steps of the protocol were preprogrammed on a thermal cycler. All samples were run in duplicate. For comparison of mitochondrial DNA, a somatic gene (tubulin) was compared with a mitochondrial gene (mtCo1) as previously described [58].

#### RNA Transcript Abundance

RNA transcript abundance was also measured using real time qPCR, again with diluted samples of cDNA of 1:500. Reaction mix was prepared daily fresh, 8  $\mu$ l of this mix was added to each well, followed by 2  $\mu$ l of cDNA sample. Incubation steps of the protocol were preprogrammed on a thermal cycler. Samples were run in duplicate, and GAPDH was used as a housekeeping gene.

#### *Transmission Electron Microscopy:*

Electron microscopy imaging was obtained using the contralateral ovary from each mouse described above. The ovaries were placed in a drop of cold primary fix containing 2.5% glutaraldehyde in 0.1M cacodylate buffer to a pH of 7.4 at 4<sup>o</sup> C. The ovary was then washed in buffer for fifteen minutes 3 times and placed in 1% OsO<sub>4</sub> in 0.1M cacodylate for 45 minutes at 4<sup>o</sup> C. Following this, the specimens were washed for fifteen minutes 3 times in distilled water, then 50% ethanol twice, 70% ethanol twice, and finally 100% ethanol three times for 20 minutes each. The specimens were then incubated with 2 parts 100% ethanol to one part resin for one hour, then one part 100% ethanol to one part resin overnight, then by one part 100% ethanol to three parts resin for one hour, and finally by pure resin with a catalyst for four hours. The ovaries were then embedded in fresh resin and cured at 62<sup>o</sup> C for two days. These blocks were used to prepare slides for light microscopy to identify oocytes in the ovarian stroma. Once identified, the tissue block was cut with an ultramicrotome at 50 nanometers and the thin sections were placed on a copper grid and stained with heavy metals to be viewed

under the electron beam of a transmission electron microscope. Images of individual oocytes from each specimen were captured at 2500x, 6000x, 15000x, and 25000x.

*Primers Used:*

| Gene    | Gene ID | Sequence ID    | Forward 5'-3'             | Reverse 5'-3'            |
|---------|---------|----------------|---------------------------|--------------------------|
| Gdf9    | 14566   | NM_008110.2    | GGCAGTCTCTTCAGTCCACC      | CGGGGAGATCTTTCCACCTC     |
| Bmp15   | 12155   | NM_009757.5    | ACAGTGACCTCAGCCTTCC       | ACAGGACTGGGCAATCATACC    |
| Ikbkb   | 16150   | NM_010546.2    | TTCCAGCTGAGAAAGTGTGG      | GGCCATGGCGTTCTTCATCTTA   |
| Itga1   | 109700  | NM_001033228.3 | CGGAAACGAGAGCTGGCTATT     | TCCACAGAGCTAATATAAGCAGCA |
| Itga4   | 16401   | NM_010576.3    | TGCATGAAAGCTGATCAACAC     | TGAGGTCTCATCCATTTCCAAGAT |
| Itga6   | 16403   | NM_008397.4    | GACTCTCAACTGCAGCGTCA      | GTGCTGTTCCACAACCTGGA     |
| Itgav   | 16410   | NM_008402.3    | ACTGCACGGCAGATACAGAG      | CACAGCCCAAAGTGTGAACAT    |
| Itgax   | 16411   | NM_021334.2    | ACTTTACAAGGCTGGTTTCTTCA   | AGTTCTCACTGGGCAACCTG     |
| Pdgfra  | 18595   | NM_011058.3    | CCATGCCACCAGTGAAGTCTAT    | CGGCAACAGGTTTCTCCACTA    |
| Pgr     | 18667   | NM_008829.2    | TCCTAAATGAGCAGAGGATGAAG   | TCATGGGTCACTGGAGTTTG     |
| Ppp2ca  | 19052   | NM_019411.4    | GCCATGACCGGAACGTAGTA      | GCTGGGTCAAATGCAAGAAAG    |
| Gja1    | 14609   | NM_010288.3    | TGATTTCCCTGACGACAGCC      | ATCTCCAGGTCATCAGGCCG     |
| Egfr    | 13649   | NM_007912.4    | CAACATCCTGGAGGGGAAC       | TGGATGCAGTTGTCTGGTCC     |
| Tuba1b  | 22143   | NM_011654.2    | TGGTGTGGATTCTGTGGAAGG     | GCCTGCAACTAATACTGGAGC    |
| Tuba1c  | 22146   | NM_009448.4    | CTGTGTATGTGGGTGAGGGCA     | TCGTCTCCTTCAGCACTATCTG   |
| Lhcgr   | 16867   | NM_013582.2    | TTGCTGAGCAGATTTGTTGTC     | AGCCTGGGAAGGCTTACTTG     |
| Oxtr    | 18430   | NM_001081147.1 | CCTGGAGAGACGAGCATTAGC     | TCATGCCGAGGATGGTTGAG     |
| Pgrmc1  | 53328   | NM_016783.4    | TGGGACTCTCAGTTCACITTTCAA  | AGATATGCTCCACCGAATGCT    |
| Plcz1   | 114875  | NM_054066.4    | GCCAGAACTGGCATTGATACG     | GGAACACGACGATAACCTTTGT   |
| Sfrp4   | 20379   | NM_016687.3    | GCCCCCAAAGTCAAACCTG       | AGTGGGTCTTAAGGCAAGTG     |
| Zmiz1   | 328365  | NM_001310666.1 | TGCAGGAACTATGCCCCAC       | AGGAGCCCCACTGTGATGTA     |
| Amhr2   | 110542  | NM_001356575.1 | CCTGTAGGCGACACTGTTCA      | AACCCACAGAGAATGACAGCA    |
| Kat2b   | 18519   | NM_001190846.1 | CTACAAATGCGCCAGCATCC      | ACCTGTTTTAGGCACACTGCT    |
| Xrcc1   | 22594   | NM_009532.4    | AACITTTGAGGAGGCCCTGAT     | GCTGATGGGGGAGTAACTTCT    |
| Ppp2r1a | 51792   | NM_016891.3    | GCTGCCACAGTTCITTCGTA      | ACTCTGCAGGGTGTGTTATC     |
| Nobox   | 18291   | NM_130869.3    | CCGCACTAGAGGAGTCCAGA      | CAACATAGCAGGCCAGTCCA     |
| Igf1    | 16000   | NM_001111274.1 | TACTTCAACAAGCCCCACAGGC    | ATAGAGCGGGCTGCTTTTGT     |
| Igf1r   | 16001   | NM_010513.2    | TACAGCGAGGAGAAACAAGCC     | TGTCTTTCAGGCAGAGGCAG     |
| Ect2    | 13605   | NM_001177626.1 | GCACATCATCCTTAGCAGGTA     | GTCAGCGTCTTGTGAAGCA      |
| Em1     | 68519   | NM_001043335.1 | TCACAGTTCGGGGCTCCAAG      | GGGACTAAATGACTCGCCACT    |
| Diaph2  | 54004   | NM_172493.2    | AATCCAGATAACAGACGGCCC     | ATGTCTCCATTCTCCCCGGC     |
| Atrx    | 22589   | NM_009530.2    | TGATCAACTGTGTTACAGCGA     | GGCTTTGGCATCATGAGGTG     |
| Nbn     | 27354   | NM_013752.3    | AGCGCTCTTCAAGAAGATGAA     | TGCTGTCTGAAGACCATCAC     |
| Cep70   | 68121   | NM_023873.3    | ATCTTAGAGATTGATGACCTGGATG | CCTTGTCTCAGGATCAGACCTT   |
| Fgfr1-1 | 14182   | NM_001079909.2 | TTAGGCAAACCACTTGGCGA      | TGCGTCGGACTTCAACATCT     |
| Bmp8a   | 12163   | NM_007558.3    | CCATGCCATCTTGCAGTCTC      | ACCACCATGTTACGGTGTTT     |
| Nek2    | 18005   | NM_010892.3    | GCTAAAGAGCAGGCAGTCTCT     | CACCACACAAAAGGTTCCC      |
| Nek4    | 23955   | NM_001308328.1 | CACTCCCGAGGAAAAGGAG       | ACTTTCCCTCCCTGGAAATC     |
| Pcm1    | 18536   | NM_023662.3    | AGCAGGAGAAGACGTGAGTTT     | CCTGGGCAGATGCTTTTCTTG    |
| Spast   | 50850   | NM_016962.2    | TGGGTCTATCCGAGAACTGA      | CTGAGGACTCACACTGCGTT     |
| Tacc1   | 320165  | NM_199323.3    | CAGATGAAGGTGGAGTCCCTG     | CTTTCCAGCTTTGCGATCA      |
| Opa1    | 74143   | NM_133752.3    | ACAAACACTGAAGTTAGGCGA     | TTCTTGAGATCTTCTGCCAGC    |
| Dnm1l   | 74006   | NM_152816.3    | GATGTGCCAGTTCAGTTGC       | TGCCITTTGGGACTGTCTT      |
| Mfn1    | 67414   | NM_024200.4    | TCCTACTGCTCTTCTAACCCA     | CACTGTTTTCCAAATCAGCCC    |
| Mfn2    | 170731  | NM_001285921.1 | GCGCCAGTTTGTGGAATACG      | TGTCCAGACAATTCCTGCT      |

|         |       |             |                         |                        |
|---------|-------|-------------|-------------------------|------------------------|
| Gapdh   | 14433 | NM_008084.3 | AAGCTCATTTCCTGGTATGACAA | TGGGATAGGGCCTCTCTTGC   |
| Ptgs1   | 19224 | NM_008969.4 | GCCCCTATGTTTCCTTCCGT    | GGAACAAAACCTCCTCCCTCCA |
| Ptgs2   | 19225 | NM_011198.4 | TGGGCCATGGAGTGGACTTA    | GGGGATACACCTCTCCACCA   |
| Zp1     | 22786 | NM_009580.2 | ACTTGAGCCCTCAGGTTCCA    | GCCCAGATCAGACCCACAAA   |
| Zp2     | 22787 | NM_011775.7 | GCATCACTGAGGAGCAAACG    | TGGGGTCAACACCTTTGGATG  |
| Zp3     | 22788 | NM_011776.1 | CCCAGAGTTGGTTGCCAGTA    | CGGGGTCCATGGATCTGGAA   |
| mt-ND1  | 17716 | NC_005089.1 | TCCGAGCATCTTATCCACGC    | GTATGGTGGTACTCCCCTG    |
| mt-ND2  | 17717 | NC_005089.1 | ATCCTCCTGGCCATCGTACT    | ATCAGAAGTGAATGGGGCG    |
| mt-ND3  | 17718 | NC_005089.1 | ACAAGCTCTGCACGTCTACC    | TGCTCATGGTAGTGAAGTAGAA |
| mt-ND4  | 17719 | NC_005089.1 | TAATCGCACATGGCCTCACA    | CATTTGAAGTCTCGGGCCA    |
| mt-ND4L | 17720 | NC_005089.1 | CCATACCAATCCCCATCACCA   | CGTAATCTGTTCCGTACGTGT  |
| mt-ND5  | 17721 | NC_005089.1 | TAGCCTGGCAGACGAACAAG    | GTATTCCTGTGAGGGCGAGG   |
| mt-ND6  | 17722 | NC_005089.1 | CCGCAAACAAGATCACCCAG    | CTTGATGGTTTGGGAGATTGGT |
| MT-Cytb | 17711 | NC_005089.1 | TGCATACGCCATTCTACGCT    | AGGCTTCGTTGCTTTGAGGT   |
| mt-Co1  | 17708 | NC_005089.1 | TCGCAATTCCTACCGGTGTC    | CCGGTTAGACCACCAACTGT   |
| mt-Co2  | 17709 | NC_005089.1 | CCTGGTGAACACTGACTGCT    | GGACTGCTCATGAGTGGAGG   |
| mt-Co3  | 17710 | NC_005089.1 | CAAGGCCACCACACTCCTAT    | GTCAGCAGCCTCCTAGATCA   |
| mt-ATP6 | 17705 | NC_005089.1 | CCAATGGCATTAGCAGTCCG    | AATGGTAGCTGTTGGTGGGC   |
| mt-ATP8 | 17706 | NC_005089.1 | CAAACATTCCTACTGGCACC    | TTGTTGGGGTAATGAATGAGGC |
| mt-Rnr1 | 17724 | NC_005089.1 | TCGGCGTAAAACGTGTCAAC    | TTGGGTCTTAGCTGTCGTGT   |
| mt-Rnr2 | 17725 | NC_005089.1 | AATTTCGGTTGGGGTGACCT    | AGGATTGCGCTGTTATCCCT   |
